# Supplementary material for: Intrinsic kinetic study of 1-butene isomerization over magnesium oxide catalyst via a Berty stationary catalyst basket reactor
Source: Royal Society of Chemistry journal article supplement (doi:10.1039/d0ra05453d), 2020-01-01
Supplement: d0ra05453d1.pdf [file d0ra05453d1.pdf]

## Supplementary Information

Intrinsic Kinetic Study of 1-Butene Isomerization over Magnesium Oxide Catalyst via Bertly Stationary Catalyst Basket Reactor

Khunnawat Ountaksinkul,<sup>a</sup> Sippakorn Wannakao,<sup>b</sup> Piyasan Praserttham,<sup>a</sup> and Suttichai Assabumrungrat<sup>a, c\*</sup>

### Results and Discussion

Table S1: The slope and intercept of linear equations in Figure 10.

|                 | $k_1$    | $k_2$    | $K_A$   | $K_B$   | $K_C$   |
|-----------------|----------|----------|---------|---------|---------|
| $m$ (slope)     | -9454.91 | -7399.57 | 1997.88 | 1614.09 | 1630.49 |
| $C$ (intercept) | 2.203    | -0.487   | -3.298  | -1.297  | -1.229  |

From the Arrhenius's equation as shown in equation 10, this equation was rewritten into the form of the linear equation in equation S1.

$$k_i = A_{0,i} \exp\left(\frac{-E_{a,i}}{RT}\right) \quad (10)$$

$$\ln^{\text{[m]}}(k_i) = \frac{-E_{a,i}}{RT} + \ln^{\text{[m]}}(A_{0,i}) \quad (S1)$$

Therefore, the slope ( $m$ ) and intercept ( $C$ ) for  $\ln^{\text{[m]}}(k_1)$  and  $\ln^{\text{[m]}}(k_2)$  in Figure 10 can be compared with  $-E_{a,i}/R$  and  $\ln^{\text{[m]}}(A_{0,i})$  in equation S1, respectively. After that, the activation energies ( $E_{a,i}$ ) and pre-exponential factor according to Arrhenius's equation ( $A_{0,i}$ ) can be calculated from these correlations. For example, the  $E_{a,1}$  can be calculated by the slope of  $\ln^{\text{[m]}}(k_1)$ , which equals to -9454.9 and gas constant is 8.314 (J/mol/K) as shown in equations S2.

$$m = -9454.9 = \frac{-E_{a,1}}{8.314} \quad (S2)$$

Then:

$$E_{a,1} = 78.608 \text{ kJ/mol} \quad (S3)$$

For pre-exponential factor according to Arrhenius's equation ( $A_{0,i}$ ):

$$C = 2.203 = \ln(A_{0,1}) \quad (S4)$$

Therefore:

$$A_{0,1} = 9.052 \quad (S5)$$

For deriving the van't Hoff equation, the correlation of adsorption equilibrium constant at different temperatures,  $T_1$  and  $T_2$  were given below.

$$\ln^{\text{[m]}}(K_1) = \frac{-\Delta H_i}{RT_1} + \frac{\Delta S}{R} \quad (S6)$$

$$\ln^{\text{[m]}}(K_2) = \frac{-\Delta H_i}{RT_2} + \frac{\Delta S}{R} \quad (S7)$$

Then subtraction yields:

$$\ln^{i:0}(K_1) - \ln^{i:0}(K_2) = \frac{-\Delta H_i}{R} \left[ \frac{1}{T_1} - \frac{1}{T_2} \right] \quad (S8)$$

which equation S8 is equal to the van't Hoff equation as shown in equation 11. Consequently, the slope ( $m$ ) and intercept ( $C$ ) of  $\ln^{i:0}(K_A)$ ,  $\ln^{i:0}(K_B)$ , and  $\ln^{i:0}(K_C)$  in Figure 10 can be also compared with  $-\Delta H_i/R$  and  $\Delta S/R$  in equation S6 or S7. The adsorption enthalpies ( $\Delta H_i$ ) can be interpreted from the slope of graphs  $\ln^{i:0}(K_A)$ ,  $\ln^{i:0}(K_B)$ , and  $\ln^{i:0}(K_C)$ . In case of  $\ln^{i:0}(K_A)$ , the slope of graph is equal to 1997.88, so the  $\Delta H_i$  can be estimated as shown in equations S9, and S10.

$$K_i = K_{0,i} \exp\left(\frac{-\Delta H_i}{R} \left[ \frac{1}{T} - \frac{1}{T_0} \right]\right) \quad (11)$$

$$m = 1997.88 = \frac{-\Delta H_A}{8.314} \quad (S9)$$

$$\Delta H_A = -16.610 \text{ kJ/mol} \quad (S10)$$

However, the  $\Delta S/R$  was not used in van't Hoff equation. For van't Hoff equation, if we know the equilibrium constant at any temperature and the enthalpy, we can determine  $K$  at any other temperature. For this research, the reference temperature was fixed at 723.15 K. Therefore, the adsorption coefficients at the reference temperature ( $K_{0,i}$ ) were represented by the adsorption coefficients at 723.15 K. The values of  $\Delta H_i$  and  $K_{0,i}$  were tabulated in Table 4.
